# Supplementary material for: A spherical falling film gas-liquid equilibrator for rapid and continuous measurements of CO2 and other trace gases
Source: PLoS One. 2019 Sep 25;14(9):e0222303. doi: 10.1371/journal.pone.0222303 (PMC6760761; doi:10.1371/journal.pone.0222303)
Supplement: S1 Table — (CSV) [file pone.0222303.s004.csv]

min	Date	Single CO2	Dual CO2
1	9/25/17 13:50		154
2	9/25/17 13:51		153
3	9/25/17 13:52		151
4	9/25/17 13:53		149
5	9/25/17 13:54		148
6	9/25/17 13:55		147
7	9/25/17 13:56		146
8	9/25/17 13:57		145
9	9/25/17 13:58		145
10	9/25/17 13:59		144
11	9/25/17 14:00		144
12	9/25/17 14:01		144
13	9/25/17 14:02	143
14	9/25/17 14:03	143
15	9/25/17 14:04	143
16	9/25/17 14:05	143
17	9/25/17 14:06	143
18	9/25/17 14:07	143
19	9/25/17 14:08	415
20	9/25/17 14:09	373
21	9/25/17 14:10	362
22	9/25/17 14:11	334
23	9/25/17 14:12	310
24	9/25/17 14:13	290
25	9/25/17 14:14	263
26	9/25/17 14:15	241
27	9/25/17 14:16	223
28	9/25/17 14:17	209
29	9/25/17 14:18	196
30	9/25/17 14:19	187
31	9/25/17 14:20	178
32	9/25/17 14:21	172
33	9/25/17 14:22	166
34	9/25/17 14:23	162
35	9/25/17 14:24	159
36	9/25/17 14:25	156
37	9/25/17 14:26	154
38	9/25/17 14:27	152
39	9/25/17 14:28	150
40	9/25/17 14:29	149
41	9/25/17 14:30	148
42	9/25/17 14:31	147
43	9/25/17 14:32	147
44	9/25/17 14:33	146
45	9/25/17 14:34	146
46	9/25/17 14:35	145
47	9/25/17 14:36	145
48	9/25/17 14:37	145
49	9/25/17 14:38	145
50	9/25/17 14:39	145
51	9/25/17 14:40	145
52	9/25/17 14:41	144
53	9/25/17 14:42	144
54	9/25/17 14:43	144
55	9/25/17 14:44	144
56	9/25/17 14:45	144
57	9/25/17 14:46	144
58	9/25/17 14:47	144
59	9/25/17 14:48	144
60	9/25/17 14:49	144
61	9/25/17 14:50	144
62	9/25/17 14:51	144
63	9/25/17 14:52	144
64	9/25/17 14:53	144
65	9/25/17 14:54	144
66	9/25/17 14:55	144
67	9/25/17 14:56	144
68	9/25/17 14:57	144
69	9/25/17 14:58	144
70	9/25/17 14:59	144
71	9/25/17 15:00	144
72	9/25/17 15:01	144
73	9/25/17 15:02	144
74	9/25/17 15:03	144
75	9/25/17 15:04	144
76	9/25/17 15:05	144
77	9/25/17 15:06	144
78	9/25/17 15:07	145
79	9/25/17 15:08	145
80	9/25/17 15:09	145
81	9/25/17 15:10	145
82	9/25/17 15:11	145
83	9/25/17 15:12	145
84	9/25/17 15:13	145
85	9/25/17 15:14	145
86	9/25/17 15:15	145
87	9/25/17 15:16	145
88	9/25/17 15:17	145
89	9/25/17 15:18	145
90	9/25/17 15:19	145
91	9/25/17 15:20	145
92	9/25/17 15:21	145
93	9/25/17 15:22	145
94	9/25/17 15:23	145
95	9/25/17 15:24	145
96	9/25/17 15:25	145
97	9/25/17 15:26	145
98	9/25/17 15:27	145
99	9/25/17 15:28	145
100	9/25/17 15:29	145
101	9/25/17 15:29	145
102	9/25/17 15:30	145
103	9/25/17 15:31	145
104	9/25/17 15:32	145
105	9/25/17 15:33	145
106	9/25/17 15:34	145
107	9/25/17 15:35	146
108	9/25/17 15:36	419
109	9/25/17 15:37	389
110	9/25/17 15:38	352
111	9/25/17 15:39	324
112	9/25/17 15:40	305
113	9/25/17 15:41	289
114	9/25/17 15:42	274
115	9/25/17 15:43	260
116	9/25/17 15:44	248
117	9/25/17 15:45	237
118	9/25/17 15:46		225
119	9/25/17 15:47		214
120	9/25/17 15:48		204
121	9/25/17 15:49		196
122	9/25/17 15:50		189
123	9/25/17 15:51		183
124	9/25/17 15:52		178
125	9/25/17 15:53		173
126	9/25/17 15:54		170
127	9/25/17 15:55		166
128	9/25/17 15:56		163
129	9/25/17 15:57		161
130	9/25/17 15:58		159
131	9/25/17 15:59		157
132	9/25/17 16:00		156
133	9/25/17 16:01		154
134	9/25/17 16:02		153
135	9/25/17 16:03		152
136	9/25/17 16:04		151
137	9/25/17 16:05		151
138	9/25/17 16:06		150
139	9/25/17 16:07		149
140	9/25/17 16:08		149
141	9/25/17 16:09		149
142	9/25/17 16:10		148
143	9/25/17 16:11		148
144	9/25/17 16:12		148
145	9/25/17 16:13		148
146	9/25/17 16:14		147
147	9/25/17 16:15		147
148	9/25/17 16:16		147
149	9/25/17 16:17		147
150	9/25/17 16:18		147
151	9/25/17 16:19		147
152	9/25/17 16:20		147
153	9/25/17 16:21		147
154	9/25/17 16:22		146
155	9/25/17 16:23		146
156	9/25/17 16:24		146
157	9/25/17 16:25		146
158	9/25/17 16:26		146
159	9/25/17 16:27		146
160	9/25/17 16:28		146
161	9/25/17 16:29		146
162	9/25/17 16:30		146
163	9/25/17 16:31		146
164	9/25/17 16:32		146
165	9/25/17 16:33		146
166	9/25/17 16:34		146
167	9/25/17 16:35		146
168	9/25/17 16:36		146
169	9/25/17 16:37		146
170	9/25/17 16:38		146
171	9/25/17 16:39		146
172	9/25/17 16:40		146
173	9/25/17 16:41		146
174	9/25/17 16:42		146
175	9/25/17 16:43		146
176	9/25/17 16:44		146
177	9/25/17 16:45		146
